# Supplementary material for: The Lack of Standardized Outcomes for Surgical Salvage of HPV-Positive Recurrent Oropharyngeal Squamous Cell Carcinoma: A Systematic Scoping Review
Source: MDPI journal article supplement (doi:10.3390/cancers15102832), 2023-05-19
Supplement: s1 [file s1]

# Supplemental Table S1: Search strategy

Search conducted on October 10, 2022

|                                                                                                                                                                                                                                                                                                                                                                                                                                                                                                                                                                                                                                                                                                                                                                                                                                                                                                                                                                                                                                                                                                                                                                                                                                                                                                                                                                                                                                                                                                                     |                                   |
|---------------------------------------------------------------------------------------------------------------------------------------------------------------------------------------------------------------------------------------------------------------------------------------------------------------------------------------------------------------------------------------------------------------------------------------------------------------------------------------------------------------------------------------------------------------------------------------------------------------------------------------------------------------------------------------------------------------------------------------------------------------------------------------------------------------------------------------------------------------------------------------------------------------------------------------------------------------------------------------------------------------------------------------------------------------------------------------------------------------------------------------------------------------------------------------------------------------------------------------------------------------------------------------------------------------------------------------------------------------------------------------------------------------------------------------------------------------------------------------------------------------------|-----------------------------------|
| <p>PubMed: ("Oropharyngeal Neoplasms"[Mesh] OR Oropharyngeal Neoplasm* OR "oropharyngeal cancer"[tiab] OR "OPSCC"[tiab] OR "oropharyngeal squamous cell carcinoma "[tiab] OR "oropharyngeal carcinoma"[tiab] OR "tonsillar squamous cell carcinoma"[tiab] OR "tongue squamous cell carcinoma"[tiab]) AND ("Locoregional Recurrence"[tiab] OR Relapse* OR "Recurrent"[tiab] OR "recurrence"[tiab] OR "distant"[tiab] OR "metastatic"[tiab] OR "metastases"[tiab] OR "survival"[tiab] ) AND ("Oropharyngeal Neoplasms/virology"[MeSH] OR "Carcinoma, Squamous Cell/virology"[Mesh] OR "Carcinoma, Squamous Cell/pathology"[Mesh] OR "human papilloma virus"[tw] OR "Neoplasm Recurrence, Local/virology"[Mesh] OR "HPV"[tiab] OR Human Papillomavirus OR P16-positive OR P16 status OR P16 OR "Cyclin-Dependent Kinase Inhibitor p16/genetics"[Mesh] OR human papillomavirus-positive OR human papillomavirus-associated OR HPV-associated [tiab] OR HPV-positive[tiab] OR "Papillomavirus Infections/complications"[Mesh]) OR "Papillomavirus Infections/complications"[Majr] AND ("Salvage Therapy"[Mesh] OR "Salvage Therapy/methods"[MeSH] OR "Neoplasm Recurrence, Local/surgery"[MAJR] OR "Oropharyngeal Neoplasms/surgery"[MAJR] OR "Oropharyngeal Neoplasms/therapy"[Mesh] OR "Salvage Surgery "[tiab] OR "Surgical salvage "[tiab] OR "Neck dissection "[tiab] OR "Neck Dissection/methods"[Mesh] OR "TORS"[tiab] OR "Transoral surgery"[tiab] OR "Transoral Robotic Surgery "[tiab] OR "failure"[tiab])</p> | <p>English filtered:<br/>1708</p> |
| <p>SCOPUS:<br/>( TITLE-ABS-KEY ( ( oropharyngeal AND neoplasm OR oropharyngeal AND cancer OR opsc OR oropharyngeal AND squamous AND cell AND carcinoma OR oropharyngeal AND carcinoma ) ) AND TITLE-ABS-KEY ( ( relapse OR recurrent OR recurrence OR distant OR metastatic OR metastases OR survival ) ) AND TITLE-ABS-KEY ( ( hpv OR p16 OR human AND papillomavirus OR virology ) ) AND TITLE-ABS-KEY ( ( salvage OR surgery OR neck AND dissection OR surgical AND salvage OR cancer AND surgery ) ) )</p>                                                                                                                                                                                                                                                                                                                                                                                                                                                                                                                                                                                                                                                                                                                                                                                                                                                                                                                                                                                                      | <p>English filtered:<br/>305</p>  |
| <p>Cinahl:<br/>( oropharyngeal neoplasm OR oropharyngeal cancer OR opsc OR oropharyngeal squamous cell carcinoma OR oropharyngeal carcinoma ) AND (relapse OR recurrent OR recurrence OR distant OR metastatic OR metastases OR survival ) AND (hpv OR p16 OR human papillomavirus OR virology ) AND (salvage OR surgery OR neck dissection OR surgical salvage OR cancer surgery)</p>                                                                                                                                                                                                                                                                                                                                                                                                                                                                                                                                                                                                                                                                                                                                                                                                                                                                                                                                                                                                                                                                                                                              | <p>English filtered:<br/>249</p>  |

Supplemental Table S2: Table of study characteristics

\*Other refers to the following countries  $\leq 1$  article: France, Australia, Sweden, Germany, Japan, International

|                            | Percent (%) |
|----------------------------|-------------|
| United States              | 65.6        |
| Canada                     | 9.4         |
| United Kingdom             | 6.2         |
| Other*                     | 18.8        |
| Total                      | 100         |
|                            |             |
| Retrospective Chart        | 62.5        |
| Retrospective Cohort       | 12.5        |
| Case Series                | 3.1         |
| Database                   | 6.3         |
| Single arm clinical trial  | 3.1         |
| Case control               | 3.1         |
| Analysis of clinical trial | 9.4         |
| Total                      | 100         |
